# Supplementary material for: GRSF1 deficiency in skeletal muscle reduces endurance in aged mice
Source: Aging (Albany NY). 2021 Jun 2;13(11):14557–70. doi: 10.18632/aging.203151 (PMC8221292; doi:10.18632/aging.203151)
Supplement: Supplementary Figures [file aging-13-203151-s001.pdf]

SUPPLEMENTARY FIGURES

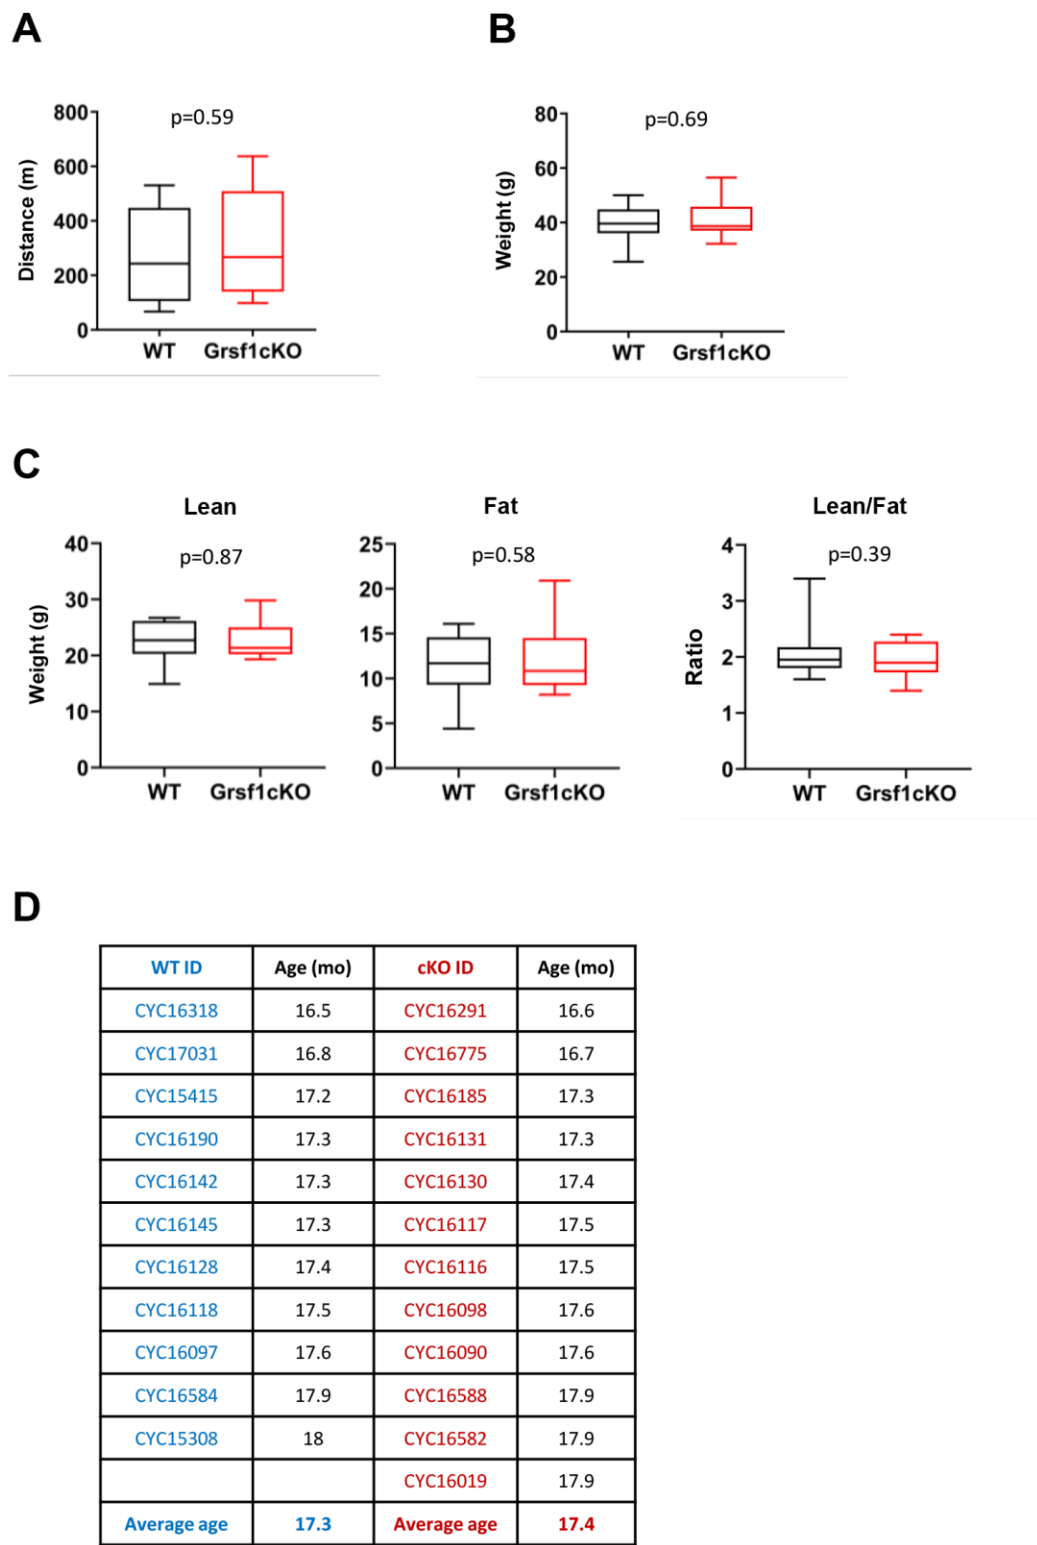

**Supplementary Figure 1. Endurance test and whole-body composition analysis at 7-9 months of age.** (A) Treadmill tests to assess muscle endurance in Grsf1cKO and WT mice at 7-9 months of age. (B) Body weights at 7-9 months of age. (C) Lean mass, fat mass, and lean/fat ratios in Grsf1cKO and WT mice. (D) Table listing ID numbers and ages of each mouse analyzed.

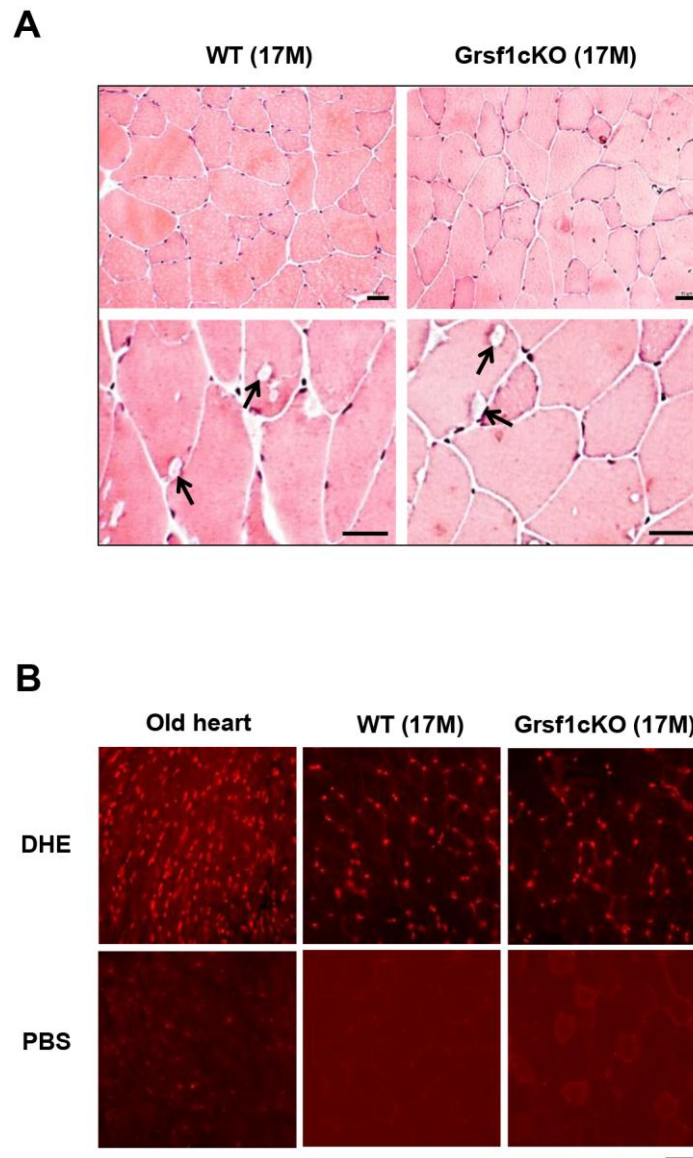

**Supplementary Figure 2. Histological analysis and ROS detection.** (A) Grsf1cKO and WT muscle histology showing normal morphology (upper panels) and the presence of marks of degeneration (arrows in lower panels) at 17 months of age. (B) DHE staining showed comparable ROS accumulation in Grsf1cKO and WT muscles (middle and right panels) in 17-month-old (17M) mice. 'Old Heart', DHE staining of 30-month-old heart muscle from normally aged mouse, as a positive control. Scale bars, 50  $\mu$ m.
