# Supplementary material for: GRSF1 deficiency in skeletal muscle reduces endurance in aged mice
Source: Aging (Albany NY). 2021 Jun 2;13(11):14557–70. doi: 10.18632/aging.203151 (PMC8221292; doi:10.18632/aging.203151)
Supplement: Supplementary Table 1 [file aging-13-203151-s002.xlsx]

## Sheet: Sheet1
Supplementary Table 1. Full list of significantly altered genes in the Grsf1cKO muscle.
Gene Symbol	GRSF1KO/WT	FDR	p value	Genbank Accession	Gene Name
Ces2c	5.54	0.1889	0.0078	NM_145603	carboxylesterase 2C
Gm5103	5.31	0.16	0.0061	XR_867252	predicted gene 5103
Mgarp	5	0.0656	0.0016	NM_026358	mitochondria localized glutamic acid rich protein
Krt18	4.86	0.0531	0.0012	NM_010664	keratin 18
8030451A03Rik	4.1	0.114	0.0036	AK038610	RIKEN cDNA 8030451A03 gene
Cxcl10	3.97	0.1331	0.0046	NM_021274	chemokine (C-X-C motif) ligand 10
Ces5a	3.46	0.0001	0	NM_001003951	carboxylesterase 5A
Abcb5	3.44	0.0214	0.0004	NM_029961	ATP-binding cassette, sub-family B (MDR/TAP), member 5
Kcnq1	3.2	0.0001	0	FJ425887	potassium voltage-gated channel, subfamily Q, member 1
6720483E21Rik	2.88	0.0001	0	NR_040492	RIKEN cDNA 6720483E21 gene
Poldip3	2.81	0.0047	0.0001		polymerase (DNA-directed), delta interacting protein 3
1700110I07Rik	2.8	0	0	NR_131068	RIKEN cDNA 1700110I07 gene
Ggt6	2.79	0.0056	0.0001	NM_027819	gamma-glutamyltransferase 6
Cacna2d2	2.73	0	0	NM_020263	calcium channel, voltage-dependent, alpha 2/delta subunit 2
LOC102635527	2.7	0.0517	0.0011	XR_866301	uncharacterized LOC102635527
A430010J10Rik	2.64	0.0096	0.0001	XR_861795	RIKEN cDNA A430010J10 gene
Kcng2	2.6	0.0124	0.0002	NM_001190373	potassium voltage-gated channel, subfamily G, member 2
Kif2c	2.56	0.0129	0.0002	NM_001290662	kinesin family member 2C
E130111B04Rik	2.53	0.1898	0.0079	XR_864176	RIKEN cDNA E130111B04 gene
Adamtsl1	2.53	0.0009	0	AK081888	ADAMTS-like 1
Shank3	2.51	0.0056	0.0001	NM_021423	SH3/ankyrin domain gene 3
Scg2	2.49	0.1364	0.0047	NM_009129	secretogranin II
Ugt3a1	2.48	0.0988	0.0029	NM_207216	UDP glycosyltransferases 3 family, polypeptide A1
Slc24a4	2.43	0.006	0.0001	NM_172152	solute carrier family 24 (sodium/potassium/calcium exchanger), member 4
Olfr728	2.43	0	0	NM_001011809	olfactory receptor 728
Mmd2	2.4	0.1058	0.0032	NM_175217	monocyte to macrophage differentiation-associated 2
Dfnb59	2.4	0.0036	0	NM_001080711	deafness, autosomal recessive 59 (human)
C920025E04Rik	2.39	0.0142	0.0002	XM_006524800	RIKEN cDNA C920025E04 gene
Sult2a5	2.38	0.0005	0	NM_001184980	sulfotransferase family 2A, dehydroepiandrosterone (DHEA)-preferring, member 5
Olfr638	2.34	0	0	NM_147120	olfactory receptor 638
Pak7	2.27	0.1618	0.0062	AK077967	p21 protein (Cdc42/Rac)-activated kinase 7
Zfp831	2.26	0.0008	0	NM_001099328	zinc finger protein 831
Sln	2.26	0.0705	0.0018	NM_025540	sarcolipin
E330037I15Rik	2.25	0.0379	0.0007	AK087890	RIKEN cDNA E330037I15 gene
Defb14	2.23	0.0135	0.0002	NM_183026	defensin beta 14
Gsdma	2.2	0.1441	0.0051	NM_021347	gasdermin A
4930401C15Rik	2.18	0	0	NR_045349	RIKEN cDNA 4930401C15 gene
Gm30667	2.17	0	0	XR_880686	predicted gene, 30667
Prune2	2.12	0.1388	0.0048	NM_181348	prune homolog 2 (Drosophila)
Csf2rb	2.11	0.0794	0.0021	AK133420	colony stimulating factor 2 receptor, beta, low-affinity (granulocyte-macrophage)
4930459L07Rik	2.1	0.0356	0.0007	NR_046190	RIKEN cDNA 4930459L07 gene
Masp1	2.06	0.1409	0.0049	D16492	mannan-binding lectin serine peptidase 1
Top2a	2.05	0.005	0.0001		topoisomerase (DNA) II alpha
Gabra5	2.03	0.0563	0.0013	NM_176942	gamma-aminobutyric acid (GABA) A receptor, subunit alpha 5
Slc26a9	2.02	0.1789	0.0072	NM_177243	solute carrier family 26, member 9
8430408G22Rik	1.99	0.0963	0.0028	NM_145980	RIKEN cDNA 8430408G22 gene
Arhgdig	1.94	0.0656	0.0016	NM_008113	Rho GDP dissociation inhibitor (GDI) gamma
Sh3bgrl2	1.91	0	0	AK029392	SH3 domain binding glutamic acid-rich protein like 2
Arhgdig	1.91	0.1848	0.0076	NM_008113	Rho GDP dissociation inhibitor (GDI) gamma
Gm518	1.9	0.0289	0.0005	BU938365	high mobility group box 1 pseudogene
Gm8505	1.88	0.0087	0.0001	AK037283	predicted gene 8505
Elovl5	1.88	0	0	XM_011242807	ELOVL family member 5, elongation of long chain fatty acids (yeast)
Scube3	1.87	0.0108	0.0001	XM_011245539	signal peptide, CUB domain, EGF-like 3
Tmem125	1.83	0.0192	0.0003	NM_172383	transmembrane protein 125
Atf3	1.83	0.0482	0.001	NM_007498	activating transcription factor 3
Ccdc38	1.82	0.0737	0.0019	NM_175488	coiled-coil domain containing 38
Ptpn5	1.81	0	0		protein tyrosine phosphatase, non-receptor type 5
Xaf1	1.8	0.1367	0.0047	BC153050	XIAP associated factor 1
Gm35243	1.78	0.019	0.0003	XR_387343	predicted gene, 35243
Abhd2	1.77	0.0543	0.0012	AK053460	abhydrolase domain containing 2
Nfkb2	1.75	0.0691	0.0017	NM_019408	nuclear factor of kappa light polypeptide gene enhancer in B cells 2, p49/p100
Maml3	1.73	0.1113	0.0035	NM_001004176	mastermind like 3 (Drosophila)
Gm19277	1.73	0.0912	0.0026	NR_040360	predicted gene, 19277
Edar	1.72	0.1222	0.004	AF160502	ectodysplasin-A receptor
Crmp1	1.72	0	0	NM_001136058	collapsin response mediator protein 1
Saa2	1.71	0	0	NM_011314	serum amyloid A 2
Fbxl22	1.71	0.0004	0	NM_175206	F-box and leucine-rich repeat protein 22
Wdr61	1.7	0.0124	0.0002	AK077037	WD repeat domain 61
1810062G17Rik	1.69	0.0172	0.0003	NM_028183	RIKEN cDNA 1810062G17 gene
Robo1	1.68	0.1829	0.0075	XM_006522965	roundabout homolog 1 (Drosophila)
Nabp1	1.68	0.1453	0.0052	NM_028696	nucleic acid binding protein 1
Gng7	1.68	0.0182	0.0003		guanine nucleotide binding protein (G protein), gamma 7
Duxbl2	1.68	0.0038	0	EU257807	double homeobox B-like 2
Akr1c6	1.67	0.0875	0.0024	NM_030611	aldo-keto reductase family 1, member C6
Tnfrsf23	1.65	0	0	NM_001308111	tumor necrosis factor receptor superfamily, member 23
Bbs7	1.65	0	0	NM_027810	Bardet-Biedl syndrome 7 (human)
Pramef8	1.64	0.0944	0.0027	AK054398	PRAME family member 8
AU024180	1.64	0.1293	0.0044	AK085976	expressed sequence AU024180
Zfp932	1.63	0.058	0.0013	AK009062	zinc finger protein 932
2900079G21Rik	1.63	0.0752	0.0019	NR_033431	RIKEN cDNA 2900079G21 gene
Gjc3	1.62	0.043	0.0009	NM_080450	gap junction protein, gamma 3
Creb3l3	1.62	0.0133	0.0002	NM_145365	cAMP responsive element binding protein 3-like 3
Rab15	1.61	0.0797	0.0021	NM_134050	RAB15, member RAS oncogene family
Mfsd7a	1.61	0.007	0.0001	NM_172883	major facilitator superfamily domain containing 7A
Gjb6	1.61	0.0533	0.0012	NM_001010937	gap junction protein, beta 6
Arrdc3	1.61	0.1094	0.0034	AK044272	arrestin domain containing 3
2810454H06Rik	1.61	0.0397	0.0008	NR_029441	RIKEN cDNA 2810454H06 gene
Micall1	1.6	0.0974	0.0029	NM_177461	microtubule associated monooxygenase, calponin and LIM domain containing -like 1
Gm13373	1.59	0.0312	0.0006	XR_866080	predicted gene 13373
Slc4a8	1.58	0.0434	0.0009	NM_021530	solute carrier family 4 (anion exchanger), member 8
Plekha5	1.58	0.1197	0.0039	XM_006506876	pleckstrin homology domain containing, family A member 5
Cdkn1a	1.57	0.107	0.0033	NM_007669	cyclin-dependent kinase inhibitor 1A (P21)
Apol7c	1.57	0.0004	0	NM_175391	apolipoprotein L 7c
Gm7008	1.56	0.0014	0	NR_045157	predicted gene 7008
Zfp385b	1.55	0.1381	0.0048	AK047859	zinc finger protein 385B
Pms2	1.55	0.0042	0		postmeiotic segregation increased 2 (S. cerevisiae)
Atp6v0b	1.52	0.1263	0.0042	AK170493	ATPase, H+ transporting, lysosomal V0 subunit B
Lman1	1.51	0.0397	0.0008	AK044539	lectin, mannose-binding, 1
Fam83h	1.5	0.019	0.0003	NM_134087	family with sequence similarity 83, member H
Poldip2	-1.5	0.1849	0.0076	AK169503	polymerase (DNA-directed), delta interacting protein 2
Krtap7-1	-1.5	0	0	NM_027771	keratin associated protein 7-1
Pde5a	-1.51	0	0	NM_153422	phosphodiesterase 5A, cGMP-specific
Olfr1309	-1.51	0.045	0.0009	NM_146447	olfactory receptor 1309
Lrfn5	-1.51	0	0	XM_006515832	leucine rich repeat and fibronectin type III domain containing 5
4933430L12Rik	-1.51	0	0	AK016998	RIKEN cDNA 4933430L12 gene
Cr2	-1.52	0.1659	0.0064	NM_007758	complement receptor 2
2010320M18Rik	-1.52	0.0016	0	BF531481	RIKEN cDNA 2010320M18 gene
LOC102639076	-1.53	0.0041	0	XR_390112	uncharacterized LOC102639076
Fpr2	-1.53	0.0007	0	NM_008039	formyl peptide receptor 2
1700001J04Rik	-1.53	0	0	AK005598	RIKEN cDNA 1700001J04 gene
Olfr139	-1.54	0	0	NM_147003	olfactory receptor 139
Gm32265	-1.54	0.0097	0.0001	XM_006516444	predicted gene, 32265
Gm31087	-1.54	0.0582	0.0013	BC049679	predicted gene, 31087
Gm14204	-1.54	0	0	NR_040358	predicted gene 14204
Bloodlinc	-1.54	0.1217	0.004	NR_131196	Bloodlinc, erythroid developmental long intergenic non-protein coding transcript
4930547E08Rik	-1.54	0.0072	0.0001	NR_040514	RIKEN cDNA 4930547E08 gene
Il12rb2	-1.56	0.1154	0.0037	NM_008354	interleukin 12 receptor, beta 2
Drd2	-1.56	0.0001	0	NM_010077	dopamine receptor D2
Unc13a	-1.57	0.0028	0	NM_001029873	unc-13 homolog A (C. elegans)
Sim2	-1.57	0.0032	0	NM_011377	single-minded homolog 2 (Drosophila)
Serpina10	-1.57	0.0003	0	AK050552	serine (or cysteine) peptidase inhibitor, clade A (alpha-1 antiproteinase, antitrypsin), member 10
Ralyl	-1.57	0.025	0.0004	NM_178631	RALY RNA binding protein-like
Itih1	-1.57	0.1712	0.0067	NM_001306078	inter-alpha trypsin inhibitor, heavy chain 1
Hdx	-1.57	0.1361	0.0047	NM_001080549	highly divergent homeobox
Twist1	-1.58	0.1077	0.0033	NM_011658	twist basic helix-loop-helix transcription factor 1
Nfatc2ip	-1.58	0.0688	0.0017	AK077216	nuclear factor of activated T cells, cytoplasmic, calcineurin dependent 2 interacting protein
H1fnt	-1.59	0.0456	0.001	NM_027304	H1 histone family, member N, testis-specific
Sntg2	-1.6	0.0028	0	NM_172951	syntrophin, gamma 2
Pglyrp3	-1.6	0.1861	0.0076	NM_207247	peptidoglycan recognition protein 3
Olfr209	-1.6	0.1621	0.0062	NM_207551	olfactory receptor 209
Nfasc	-1.6	0.176	0.0071	NM_182716	neurofascin
Six3os1	-1.62	0.0033	0	NR_015387	SIX homeobox 3, opposite strand 1
G6bos	-1.62	0.0974	0.0029	NR_001462	G6b opposite strand
Sox9	-1.64	0.0026	0	NM_011448	SRY (sex determining region Y)-box 9
Olfr362	-1.64	0.0705	0.0018	NM_147051	olfactory receptor 362
9130221J18Rik	-1.64	0	0	AK033690	RIKEN cDNA 9130221J18 gene
2610016A17Rik	-1.64	0.1669	0.0065	AK012038	RIKEN cDNA 2610016A17 gene
Etd	-1.65	0.0387	0.0008	NR_034074	embryonic testis differentiation
Urah	-1.66	0.0039	0	NM_029821	urate (5-hydroxyiso-) hydrolase
1700085C21Rik	-1.67	0.0226	0.0004	NR_046045	RIKEN cDNA 1700085C21 gene
Gm9801	-1.68	0.0968	0.0028	XR_882147	predicted gene 9801
Ggt5	-1.69	0.0639	0.0015	BC051971	gamma-glutamyltransferase 5
Vmn1r184	-1.7	0.0095	0.0001	NM_001167540	vomeronasal 1 receptor, 184
Gm35933	-1.71	0.158	0.0059	XR_384211	predicted gene, 35933
1700049E17Rik1	-1.71	0.0503	0.0011	AK006737	RIKEN cDNA 1700049E17 gene, gene 1
St6galnac6	-1.72	0.0246	0.0004	NM_001289549	ST6 (alpha-N-acetyl-neuraminyl-2,3-beta-galactosyl-1,3)-N-acetylgalactosaminide alpha-2,6-sialyltransferase 6
Olfr141	-1.72	0.0747	0.0019	NM_181818	olfactory receptor 141
Ptger3	-1.73	0.0729	0.0019	BE648209	prostaglandin E receptor 3 (subtype EP3)
Kcnb2	-1.73	0.0031	0	NM_001098528	potassium voltage gated channel, Shab-related subfamily, member 2
Csrp2bp	-1.73	0.0199	0.0003	NM_181417	cysteine and glycine-rich protein 2 binding protein
Cyp2c65	-1.75	0.1673	0.0065	NM_028191	cytochrome P450, family 2, subfamily c, polypeptide 65
Sec14l4	-1.77	0.0082	0.0001	NM_146013	SEC14-like 4 (S. cerevisiae)
Foxi1	-1.77	0.0517	0.0011	NM_023907	forkhead box I1
Akr1c18	-1.77	0.1584	0.006	NM_134066	aldo-keto reductase family 1, member C18
3930402G23Rik	-1.77	0.1842	0.0075	NR_030715	RIKEN cDNA 3930402G23 gene
Olfr612	-1.79	0.0576	0.0013	NM_001200027	olfactory receptor 612
Gm30234	-1.79	0.0193	0.0003	XR_877912	predicted gene, 30234
Gm19500	-1.79	0.06	0.0014	AK034468	predicted gene, 19500
Ttpa	-1.8	0	0	NM_015767	tocopherol (alpha) transfer protein
Gm10276	-1.8	0.0234	0.0004	AY512956	predicted gene 10276
Marchf10	-1.81	0.0312	0.0006	NM_172568	membrane-associated ring finger (C3HC4) 10
Pcdhgb1	-1.82	0.0001	0	NM_033574	protocadherin gamma subfamily B, 1
Vmn2r97	-1.83	0.0131	0.0002	NM_001104549	vomeronasal 2, receptor 97
Kcnk1	-1.83	0.0003	0	NM_008430	potassium channel, subfamily K, member 1
Olfr726	-1.84	0.0199	0.0003	NM_146316	olfactory receptor 726
Xkr9	-1.85	0.1983	0.0085	NM_001011873	X Kell blood group precursor related family member 9 homolog
Gm13974	-1.85	0.0507	0.0011	AK043709	predicted gene 13974
Diap2	-1.86	0.0284	0.0005	AK040942	diaphanous homolog 2 (Drosophila)
4933407L21Rik	-1.86	0.1246	0.0041	NR_037692	RIKEN cDNA 4933407L21 gene
Tssk4	-1.87	0	0	NM_001253888	testis-specific serine kinase 4
Gpr52	-1.87	0.1222	0.004	NM_001146330	G protein-coupled receptor 52
Gm15413	-1.87	0.0055	0.0001	NR_045874	predicted gene 15413
Gm13544	-1.87	0.0639	0.0015	NR_040365	predicted gene 13544
Ghrh	-1.87	0.0162	0.0002	NM_010285	growth hormone releasing hormone
Gm15762	-1.89	0.0869	0.0024	XR_869624	predicted gene 15762
4930448I18Rik	-1.89	0.0736	0.0019	NR_040696	RIKEN cDNA 4930448I18 gene
Olfr1375	-1.9	0.1307	0.0044	NM_146516	olfactory receptor 1375
Kcnab1	-1.91	0.0467	0.001	NM_010597	potassium voltage-gated channel, shaker-related subfamily, beta member 1
Chrnb3	-1.92	0.1267	0.0042	AK133689	cholinergic receptor, nicotinic, beta polypeptide 3
4930533N22Rik	-1.92	0	0	NR_131122	RIKEN cDNA 4930533N22 gene
6430710M23Rik	-1.93	0.0028	0	AK018303	RIKEN cDNA 6430710M23 gene
Wdr33	-1.94	0	0	AK080344	WD repeat domain 33
1700023F02Rik	-1.94	0.0028	0	NR_038039	RIKEN cDNA 1700023F02 gene
Rasef	-1.97	0	0	NM_001017427	RAS and EF hand domain containing
Olfr213	-1.97	0.0055	0.0001	NM_001011801	olfactory receptor 213
4930584F24Rik	-1.97	0	0	NR_029445	RIKEN cDNA 4930584F24 gene
Olfr926	-1.98	0.0479	0.001	NM_146815	olfactory receptor 926
LOC105242387	-1.98	0.0844	0.0023	XR_865165	uncharacterized LOC105242387
Kif17	-1.98	0.0012	0	NM_010623	kinesin family member 17
Glp2r	-1.99	0.091	0.0026	NM_175681	glucagon-like peptide 2 receptor
Spink10	-2	0.0646	0.0016	NM_177829	serine peptidase inhibitor, Kazal type 10
Gm11266	-2.02	0.0303	0.0006	BY709204	predicted gene 11266
Gk2	-2.02	0.1737	0.0069	NM_010294	glycerol kinase 2
Otx2	-2.05	0	0	NM_001286481	orthodenticle homolog 2
4930540I17Rik	-2.05	0	0	AK019728	RIKEN cDNA 4930540I17 gene
Lcn6	-2.06	0.0201	0.0003	NM_001276448	lipocalin 6
Ppp1r14d	-2.13	0.0283	0.0005	NM_028104	protein phosphatase 1, regulatory (inhibitor) subunit 14D
Agbl4	-2.13	0.0377	0.0007	NM_001284190	ATP/GTP binding protein-like 4
Nr1i2	-2.15	0.0725	0.0018	NM_010936	nuclear receptor subfamily 1, group I, member 2
LOC100503594	-2.16	0.1088	0.0034	AK090212	uncharacterized LOC100503594
Gm33936	-2.17	0.0102	0.0001	XR_383927	predicted gene, 33936
Gm16322	-2.17	0.0024	0	XR_379311	predicted gene 16322
Csnka2ip	-2.18	0	0	NM_173861	casein kinase 2, alpha prime interacting protein
Gm14051	-2.19	0.0693	0.0017	XR_866753	predicted gene 14051
4932414J04Rik	-2.21	0.026	0.0005	NR_028259	RIKEN cDNA 4932414J04 gene
LOC101055751	-2.22	0.0732	0.0019	AK042120	uncharacterized LOC101055751
Cntn1	-2.24	0.0289	0.0005	NM_001159647	contactin 1
Nrg1	-2.28	0.006	0.0001	NM_178591	neuregulin 1
C130079G13Rik	-2.28	0	0	NM_177661	RIKEN cDNA C130079G13 gene
9530034A14Rik	-2.28	0.0194	0.0003	AK020584	RIKEN cDNA 9530034A14 gene
Slc14a2	-2.31	0.0367	0.0007	NM_030683	solute carrier family 14 (urea transporter), member 2
Prg3	-2.31	0.0615	0.0015	NM_016914	proteoglycan 3
4930554P06Rik	-2.31	0.0001	0	AK016124	RIKEN cDNA 4930554P06 gene
Cntn4	-2.37	0.0032	0	AK043507	contactin 4
Cngb3	-2.41	0.1011	0.003	NM_013927	cyclic nucleotide gated channel beta 3
A330043C09Rik	-2.41	0.0447	0.0009	AK039441	RIKEN cDNA A330043C09 gene
Cacna1b	-2.43	0.0374	0.0007	XM_006497638	calcium channel, voltage-dependent, N type, alpha 1B subunit
Klre1	-2.45	0.0726	0.0018	AK041224	killer cell lectin-like receptor family E member 1
Syt16	-2.46	0	0	NM_172804	synaptotagmin XVI
4931439C15Rik	-2.46	0.0011	0	XR_877591	RIKEN cDNA 4931439C15 gene
Hbb-bh1	-2.47	0	0	NM_008219	hemoglobin Z, beta-like embryonic chain
Gm13383	-2.48	0	0	AK043615	predicted gene 13383
Gm11186	-2.5	0.0005	0	NR_046047	predicted gene 11186
Atp6v1g3	-2.5	0.0095	0.0001	NM_177397	ATPase, H+ transporting, lysosomal V1 subunit G3
Gm30661	-2.52	0.1152	0.0037	XR_377643	predicted gene, 30661
Tlx2	-2.53	0.0004	0	NM_009392	T cell leukemia, homeobox 2
4930455J16Rik	-2.54	0.0026	0	NR_045469	RIKEN cDNA 4930455J16 gene
C430002N11Rik	-2.61	0.0045	0	NR_102296	RIKEN cDNA C430002N11 gene
Gm13030	-2.73	0.006	0.0001	CK626258	predicted gene 13030
Nav2	-2.79	0	0	XR_862543	neuron navigator 2
Gm32552	-2.79	0.0037	0	XR_380833	predicted gene, 32552
Olfr681	-2.81	0.1986	0.0085	NM_207557	olfactory receptor 681
Zar1	-2.84	0	0	NM_174877	zygote arrest 1
Izumo2	-2.85	0	0	NM_029317	IZUMO family member 2
4930517O19Rik	-2.88	0	0	XR_879568	RIKEN cDNA 4930517O19 gene
Olfr1180	-2.93	0.1866	0.0077	NM_146918	olfactory receptor 1180
Cyp2c67	-3.05	0.0936	0.0027	NM_001024719	cytochrome P450, family 2, subfamily c, polypeptide 67
Ceacam11	-3.05	0	0	NM_023289	carcinoembryonic antigen-related cell adhesion molecule 11
Gm6145	-3.12	0	0	AK045385	predicted gene 6145
Cfap44	-3.17	0.1162	0.0037		cilia and flagella associated protein 44
Olfr497	-3.21	0.0298	0.0005	NM_146738	olfactory receptor 497
Adap2os	-3.27	0.1051	0.0032	XR_862104	ArfGAP with dual PH domains 2, opposite strand
Epha8	-3.51	0	0	NM_007939	Eph receptor A8
Ccdc36	-3.63	0.1328	0.0045	NM_001135198	coiled-coil domain containing 36
Bod1l	-4.19	0.0013	0	AK134590	biorientation of chromosomes in cell division 1-like
Grsf1	-4.5	0	0	NM_178700	G-rich RNA sequence binding factor 1
4731417B20Rik	-4.61	0.001	0	AK014627	RIKEN cDNA 4731417B20 gene
Dmbx1	-4.66	0.0221	0.0004	NM_130865	diencephalon/mesencephalon homeobox 1
